# Supplementary material
Source: Springer Nature journal article supplement (https://www.springermedizin.de/resource/supplementary/12889_2006_482_MOESM1_ESM.pdf/9500972)

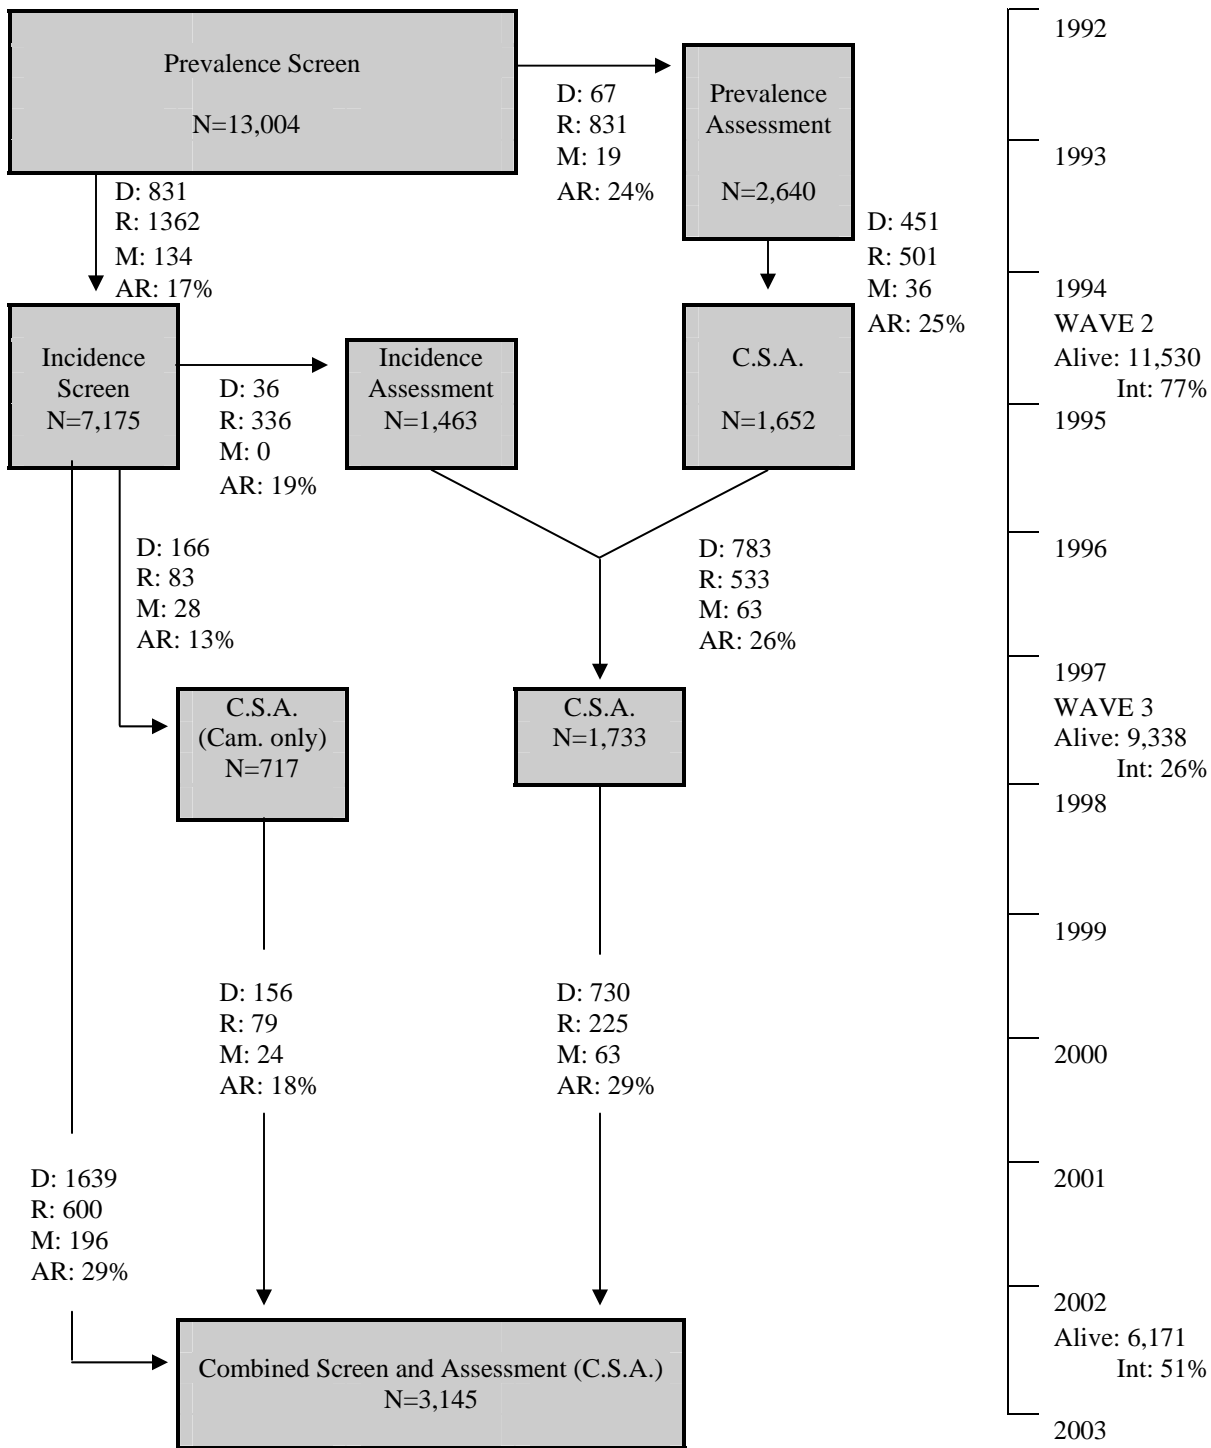

Supplement: MOESM1 [file 9500972]
